# Supplementary material
Source: PubMed Central journal article supplement (PMC8824713)
Supplement: mmc1.pdf [file mmc1.pdf]

## **Supplementary Materials**

### **Selection of surrogate viruses for process control in detection of SARS-CoV-2 in wastewater**

Md. Alamin<sup>a</sup>, Shohei Tsuji<sup>b</sup>, Akihiko Hata<sup>c</sup>, Hiroe Hara-Yamamura<sup>d</sup>, Ryo Honda<sup>d,\*</sup>

<sup>a</sup> *Graduate School of Natural Science and Technology, Kanazawa University, Japan*

<sup>b</sup> *School of Environmental Design, Kanazawa University, Japan*

<sup>c</sup> *Faculty of Engineering, Toyama Prefectural University, Japan*

<sup>d</sup> *Faculty of Geosciences and Civil Engineering, Kanazawa University, Japan*

**\*Corresponding author:** Ryo Honda

**Mailing address:** *Faculty of Geosciences and Civil Engineering, Kanazawa University,  
Kakuma-machi, Kanazawa 920-1192, Japan*

**Tel:** +81-76-264-6393

**E-mail:** rhonda@se.kanazawa-u.ac.jp

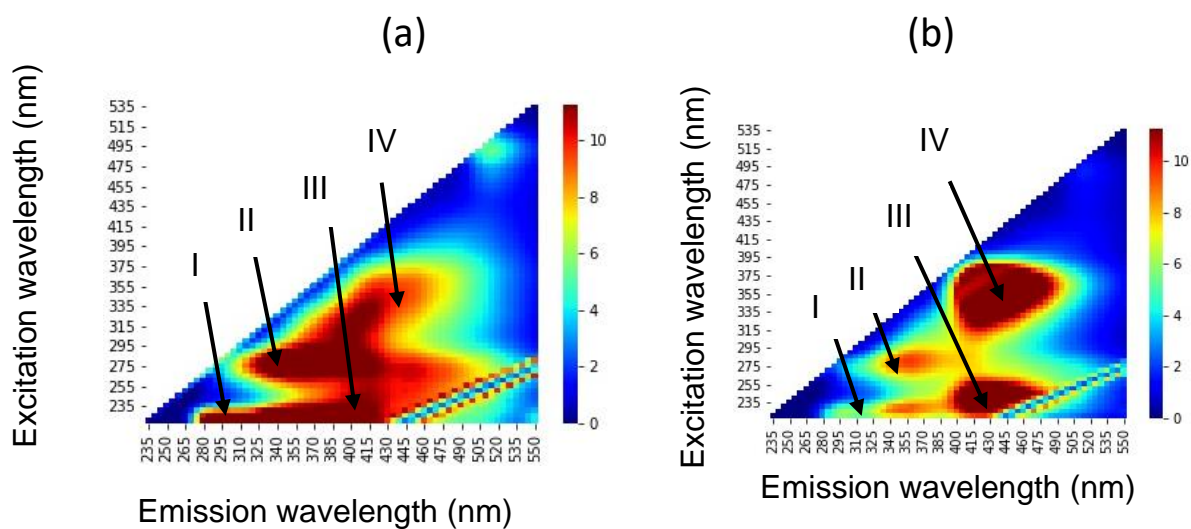

**Fig.S1.** EEM spectra of concentrate of liquids (a) wastewater A, and (b) wastewater B. Peak region I. Aromatic Protein, II. Soluble microbial by product-like, III. Fulvic acid-like IV. Humic acid-like

**Table S1.** Information of primers and probes used in this study

| Target Virus | Primer/Probe   | Sequence (5'-3')                        | Product size (bp) | Temperature for annealing | References            |
|--------------|----------------|-----------------------------------------|-------------------|---------------------------|-----------------------|
| SARS-CoV-2   | 2019-nCoV_N1-F | GACCCCAAATCAGCGAAAT                     | 72                | 60 °C                     | CDC, 2020             |
|              | 2019-nCoV_N1-R | TCTGGTACTGCCAGTTGAATCTG                 |                   |                           |                       |
|              | 2019-nCoV_N1-P | [FAM]-ACCCCGCATTACGTTTGGTGGACC-[BHQ1]   |                   |                           |                       |
| Phi 6        | Phi6_F         | TGGCGGCGGTCAAGAGC                       | 100               | 60 °C                     | Gendron et al., 2010  |
|              | Phi6_R         | GGATGATTCTCCAGAAGCTGCTG                 |                   |                           |                       |
|              | Phi6_P         | [FAM]-CGGTC GTCGCAGGTCTGACACTCGC-[BHQ1] |                   |                           |                       |
| PMMoV        | PMMV-FP1-rev   | GAGTGGTTTGACCTTAACGTTTGA                | 68                | 60°C                      | Zhang et al., 2006    |
|              | PMMV-RP1       | TTGTCGGTTGCAATGCAAGT                    |                   |                           |                       |
|              | PMMV-Probe1    | [FAM]-CCTACCGAAGCAAATG-[MGB-NFQ]        |                   |                           |                       |
| MNV          | MNV-S          | CCGCAGGAACGCTCAGCAG                     | 129               | 60 °C                     | Kitajima et al., 2010 |
|              | MNV-AS         | GGYTGAATGGGGACGGCCTG                    |                   |                           |                       |
|              | MNV-TP         | [HEX]-ATGAGTGATGGCGCA-[MGB-NFQ]         |                   |                           |                       |

**Table S2.** Sequence of the synthetic standard ssDNA. Complementary sequences to primers and probe are highlighted in green and pink, respectively. Dummy sequence inserted in CDCN1 standard is highlighted in yellow.

|                                                                                                                                          |
|------------------------------------------------------------------------------------------------------------------------------------------|
| <b>STDART_CDCN1</b> (92bp), GC content: 48%                                                                                              |
| GACCCCAAATCAGCGAAATGGGTAGCCTTGAATACTACTACACCCCGCATTAC<br>GTTTGGTGGACCCTCAGATTCAACTGGCAGTAACCAGA                                          |
| <b>STD_φ6</b> (100bp), GC content: 60%                                                                                                   |
| TGGCGGCGGTCAAGAGCAACC CGGTTCGTCGCAGGTCTGACACTCGCTCAGATC<br>GGAAGCACCGTTATGACGCCTATCAGCAGCTTCTGGAGAATCATCC                                |
| <b>STD_PMMoV</b> (68bp), GC content: 50%                                                                                                 |
| GAGTGGTTTGACCTTAACGTTTGA GAGG CCTACCGAAGCAAATGTCGC ACTTGC<br>ATTGCAACCGACAA                                                              |
| <b>STD_MNV</b> (129bp), GC content: 60%                                                                                                  |
| CCGCAGGAACGCTCAGCAGTCTTTGTGAATGAGGATGAGTGATGGCGCAGCGC<br>CAAAGCCAATGGCTCTGAGGCCAGCGCCAGGATCTTGTTCCTGCCGCCGTT<br>GAA CAGGCCGTCCCCATTCAACC |

## References

- Centers for Disease Control and Prevention (2020). 2019-novel coronavirus (2019-nCoV) real-time rRT-PCR panel primers and probes. *Centers for Disease Control and Prevention* <https://www.cdc.gov/coronavirus/2019-ncov/downloads/rt-pcr-panel-primer-probes.pdf>
- Gendron, L., Verreault, D., Veillette, M., Moineau, S., & Duchaine, C. (2010). Evaluation of filters for the sampling and quantification of RNA phage aerosols. *Aerosol Science and Technology*, 44(10), 893–901. <https://doi.org/10.1080/02786826.2010.501351>
- Kitajima, M., Oka, T., Takagi, H., Tohya, Y., Katayama, H., Takeda, N., & Katayama, K. (2010). Development and application of a broadly reactive real-time reverse transcription-PCR assay for detection of murine noroviruses. *Journal of Virological Methods*, 169(2), 269–273. <https://doi.org/10.1016/j.jviromet.2010.07.018>
- Zhang, T., Breitbart, M., Lee, W. H., Run, J. Q., Wei, C. L., Soh, S. W. L., Hibberd, M. L., Liu, E. T., Rohwer, F., & Ruan, Y. (2006). RNA viral community in human feces: Prevalence of plant pathogenic viruses. *PLoS Biology*, 4(1), 0108–0118. <https://doi.org/10.1371/journal.pbio.0040003>
